# Supplementary material
Source: publisher figshare collection journal article supplement (https://frontiersin.figshare.com/ndownloader/files/20285052)
Supplement: Supplementary file 1 [file 20285052]

This questionnaire aims to know a little better how communities live and the relationship of people with some species such as the jaguar and others. This questionnaire is voluntary. If at any time you do not want to answer you are free to do so, as well as to stop the interview whenever you want.

1.Date: \_\_\_\_/\_\_\_\_/\_\_\_\_ 2.Community: \_\_\_\_\_

**1.Hunting**

- 1.1. Do you hunt? Yes( ) No( )      1.2. How often? (Every week, a few times a month, rarely)
- 1.3. The purpose of hunting is: Subsistence?( ) Subsistence but also sometimes selling ( )      To sell ( )

**2. ATTITUDES**

2.1. How would you describe your feelings toward jaguars?  
I do not like them at all ( ) I do not like them ( ) indifferent ( ) I like them ( ) I like them a lot ( )  
Why?

2.3- In your opinion, killing jaguars is:  
Bad ( ) Neither bad nor good ( ) Good ( )

**3. KNOWLEDGE AND EXPERIENCES**

3.1. Tell us how much you agree with the following statement: "Jaguars kill more people every year in Bolivia than do domestic dogs":  
I do not agree at all \_\_\_\_\_ I disagree \_\_\_\_\_ I do not \_\_\_\_\_ I agree \_\_\_\_ I totally agree \_\_\_\_\_

3.2. How many jaguars do you think exist in the territory of your Community?

3.3. How many times have you seen a jaguar?

And this year? \_\_\_\_\_

**4. PERCEPTIONS OF IMPACT**

4.1. Have you ever been attacked or know someone who was attacked by a jaguar? Yes/No  
If yes, tell us about it:

4.2- Has a jaguar attacked your domestic animals? Yes \_\_\_\_\_ No \_\_\_\_\_  
If yes, tell us about it:

4.3- What is the risk that a jaguar attacks you or your family in the coming months?  
a) None b) Low c) Medium d) High e) No Opinion

**5. EMOTIONS**

5.1- Imagine this situation: You are collecting Brazil nuts or walking alone in the forest and you are face to face with a jaguar. What would you feel?

## Santa Rosa de Abuná

5.2- Imagine this situation: You are walking alone in the bush and see a fresh jaguar print. What would you feel?

### 6- NORMS AND PERCEIVED BEHAVIORAL CONTROLS

6.1. How much do you identify with the other community members in your community?

Nothing ( ) Little ( ) Medium ( ) Much ( ) Completely ( )

6.2. How many of your neighbors do you think kill jaguars?

None ( ) few ( ) close to half ( ) many ( ) all ( )

6.3. Among your neighbors, how many would agree that killing a jaguar is a good thing?

None ( ) Few ( ) Half ( ) Many ( ) All ( )

6.4. Within your family, how many would agree that killing a jaguar is a good thing?

None ( ) Few ( ) Half ( ) Many ( ) All ( )

6.5. What would you like to happen, in the next 5 years, to the jaguar populations that live in the territory of your Community?

Disappear ( ) decrease a lot ( ) decrease a bit ( ) remain ( ) increase a little ( ) increase a lot ( )

Why?

### 7. BEHAVIOR: JAGUAR KILLING

7.1. Have you ever killed (or has your spouse killed, for women) a jaguar? No ( ) Yes ( )

7.2. How many? \_\_\_\_\_ 7.3. Why? \_\_\_\_\_

7.4. When was the last time you killed a jaguar? \_\_\_\_\_

### 8. IDENTIFICATION

8.1. Gender: Female/Male

8.2. Age: \_\_\_\_\_

8.3. How long have you lived in this community?: \_\_\_\_\_

8.4. Where did you originate from? \_\_\_\_\_

8.5. School level: a. ( ) Illiterate b. ( ) Incomplete primary c. ( ) Completed primary d. ( ) Incomplete secondary e. ( ) Finished secondary f. ( ) Others \_\_\_\_\_
